# Supplementary material
Source: Springer Nature journal article supplement (https://www.springermedizin.de/resource/supplementary/13058_2009_2445_MOESM1_ESM.pdf/9701426)
Supplement: MOESM1 [file 9701426]

The Swedish Multigeneration Register identified women born 1932 and onwards and their mothers who were alive in 1947

Mothers with a diagnosis of Diabetes identified from the Swedish Patient and Cause of Death Registers between 1964 and 2006

n=291,360

Breast cancer cases identified from the Swedish Cancer Register between 1958 and 2005

n=7,956 (daughters)  
n=14,099 (mothers)

Person-time of follow-up calculated for each daughter identified from birth until the diagnosis of breast cancer, death, emigration, or December 31, 2005 (end of follow-up), whichever occurred first.

12,173,821 person-years
